# Supplementary material for: Lipid-Lowering Drug, Fenofibrate Combined with si-HOTAIR Can Effectively Inhibit the Proliferation of Gliomas
Source: Research Square preprint supplement (doi:10.21203/rs.3.rs-111977/v1), 2020-12-03
Supplement: Supplementary file 3 [file 136f4e3b8f9cf6a94477d2b7.docx]

**Lipid-lowering drug, fenofibrate combined with si-HOTAIR can effectively inhibit the proliferation of gliomas**

Wei Zhu1,2,3, Hongyang Zhao4, Fenfen Xu4, Bin Huang1,2, Xiaojing Dai5, Jikui Sun6,7, Alphonce M.K Nyalali1,2,8 , Kailiang Zhang1,2*, Shilei Ni1,2*

*Correspondence: Kailiang-zhang@email.sdu.edu.cn (K. Zhang); [ytfishn@126.com](mailto:ytfishn@126.com) (S. Ni).

1Department of Neurosurgery, Qilu Hospital, Cheeloo College of Medicine, Shandong University and Institute of Brain and Brain-Inspired Science, Shandong University, Jinan 250012, Shandong, China;

Full list of author information is available at the end of the article.

**Supplementary Table 1. Information of 21 glioma samples with different grades.**

| grade | score |
| --- | --- |
| IV | 2 |
| IV | 4 |
| IV | 3 |
| IV | 3 |
| IV | 3 |
| IV | 4 |
| III | 6 |
| III | 6 |
| III | 3 |
| III | 8 |
| III | 6 |
| III | 3 |
| III | 4 |
| III | 6 |
| III | 4 |
| II | 6 |
| II | 9 |
| II | 9 |
| II | 8 |
| II | 8 |
| II | 12 |
