# Supplementary material for: Lipid-Lowering Drug, Fenofibrate Combined with si-HOTAIR Can Effectively Inhibit the Proliferation of Gliomas
Source: Research Square preprint supplement (doi:10.21203/rs.3.rs-111977/v1), 2020-12-03
Supplement: Supplementary file 4 [file 266a36cd50767809d1ef87bd.xlsx]

## Sheet: 评分
grade	score
IV	2
IV	4
IV	3
IV	3
IV	3
IV	4
III	6
III	6
III	3
III	8
III	6
III	3
III	4
III	6
III	4
II	6
II	9
II	9
II	8
II	8
II	12
